# Supplementary material
Source: HighWire-hosted journal article supplement (https://cmaj.ca/highwire/filestream/58334/field_highwire_adjunct_files/3/con-benson-4-at.pdf)
Supplement: con-benson-4-at.pdf [file con-benson-4-at.pdf]

**Appendix 4 (as submitted by the authors):** Summary statistics for initial post-concussion symptoms other than those consistently recorded over the seven regular seasons of study.

| <b>Signs / Symptoms</b>        | <b>Yes</b> | <b>No</b> | <b>% Present</b> |
|--------------------------------|------------|-----------|------------------|
| “Don’t Feel Right”             | 227        | 103       | 68.8             |
| Feeling like “in a fog”        | 88         | 47        | 65.2             |
| Feeling Slowed Down            | 69         | 66        | 51.1             |
| Feeling “pressure in head”     | 62         | 71        | 46.6             |
| Drowsiness                     | 56         | 79        | 41.8             |
| Concentration Dysfunction      | 88         | 237       | 27.1             |
| Confusion                      | 87         | 242       | 26.4             |
| Balance Problems               | 35         | 101       | 25.7             |
| More Emotional                 | 26         | 109       | 19.3             |
| Memory Dysfunction             | 63         | 269       | 19.0             |
| Loss of Immediate Recall       | 64         | 329       | 16.3             |
| Altered Information Processing | 32         | 168       | 16.0             |
| Sensitivity to Noise           | 19         | 115       | 14.2             |
| Altered Attention Span         | 39         | 354       | 9.92             |
| Not Oriented to Time           | 15         | 185       | 7.50             |
| Not Oriented                   | 25         | 366       | 6.83             |
| Numbness / Tingling            | 8          | 128       | 5.88             |
| Depression / Sadness           | 15         | 325       | 4.41             |
| Nystagmus                      | 14         | 379       | 3.56             |

**Appendix to:** Benson BW, Meeuwisse WH, Rizos J. A prospective study of concussions among National Hockey League players during regular season games: the NHL-NHLPA Concussion Program. *CMAJ* 2011. DOI:10.1503/cmaj.092190.

|                        |    |     |      |
|------------------------|----|-----|------|
| Not Oriented to Place  | 7  | 193 | 3.50 |
| Tinnitus               | 10 | 383 | 2.54 |
| Personality Change     | 8  | 384 | 2.04 |
| Altered Pupil Size     | 5  | 388 | 1.27 |
| Not Oriented to Person | 2  | 198 | 1.00 |
| Speech Difficulties    | 3  | 390 | 0.76 |
| Sleep Disturbance      | 1  | 392 | 0.25 |
